# Supplementary material for: Synthesis and characterizations of natural limestone-derived nano-hydroxyapatite (HAp): a comparison study of different metals doped HAps on antibacterial activity
Source: Royal Society of Chemistry journal article supplement (doi:10.1039/d1ra00308a), 2021-01-01
Supplement: d1ra00308a1.pdf [file d1ra00308a1.pdf]

## Synthesis and Characterizations of Natural Limestone-Derived Nano-Hydroxyapatite (HAp): A Comparison Study of Different Metals Doped HAp on Antibacterial Activity

Karya Sinulingga\*<sup>1</sup>, Makmur Sirait\*<sup>1</sup>, Nurdin Siregar<sup>1</sup>, Hairus Abdullah<sup>2</sup>

<sup>1</sup>Department of Physics, Faculty of Mathematics and Natural Sciences, Universitas  
Negeri Medan, 20221, Indonesia

<sup>2</sup>Department of Industrial Engineering, Universitas Prima Indonesia, Medan, Indonesia

\*Corresponding author: [maksir@unimed.ac.id](mailto:maksir@unimed.ac.id)

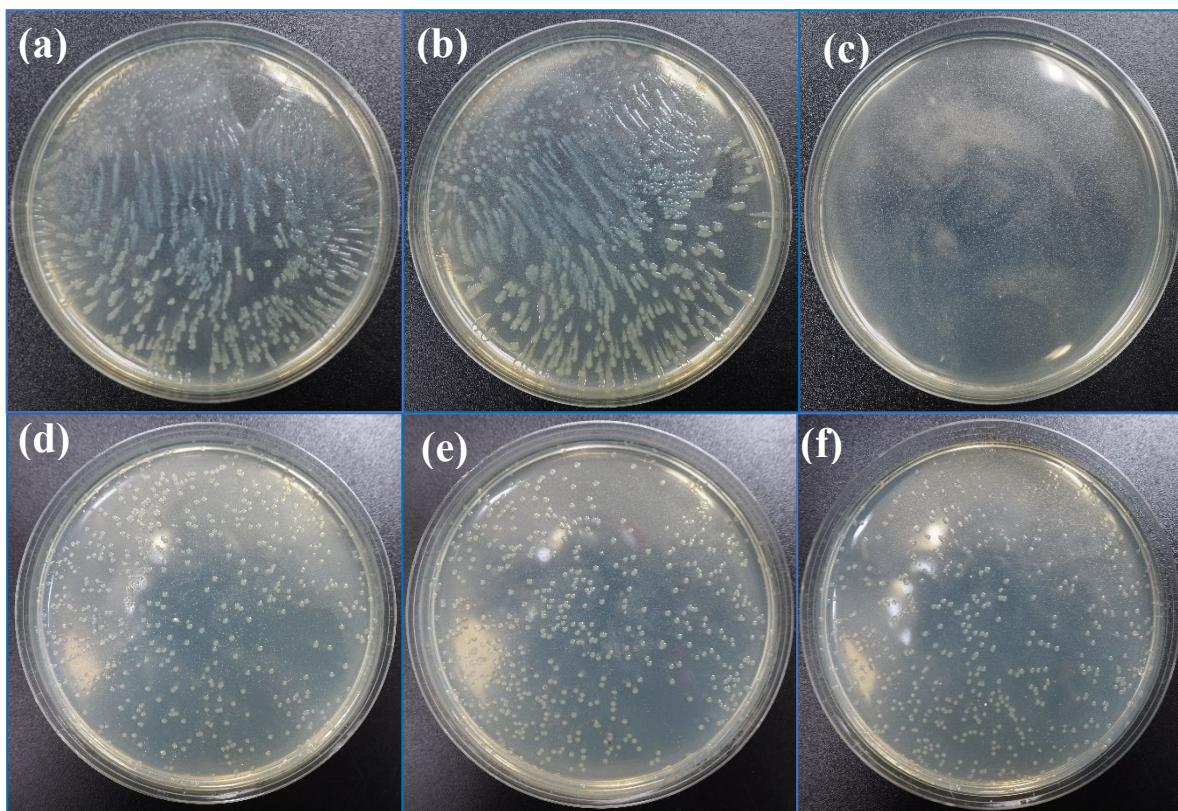

**Figure S1.** Photograph images of the antibacterial tests of (a) control (b) pristine HAp, (b) Ag-, (c) Zn-, (d) Cu-, and (e) Mg-HAp toward *E. coli* bacteria on Petri dishes.

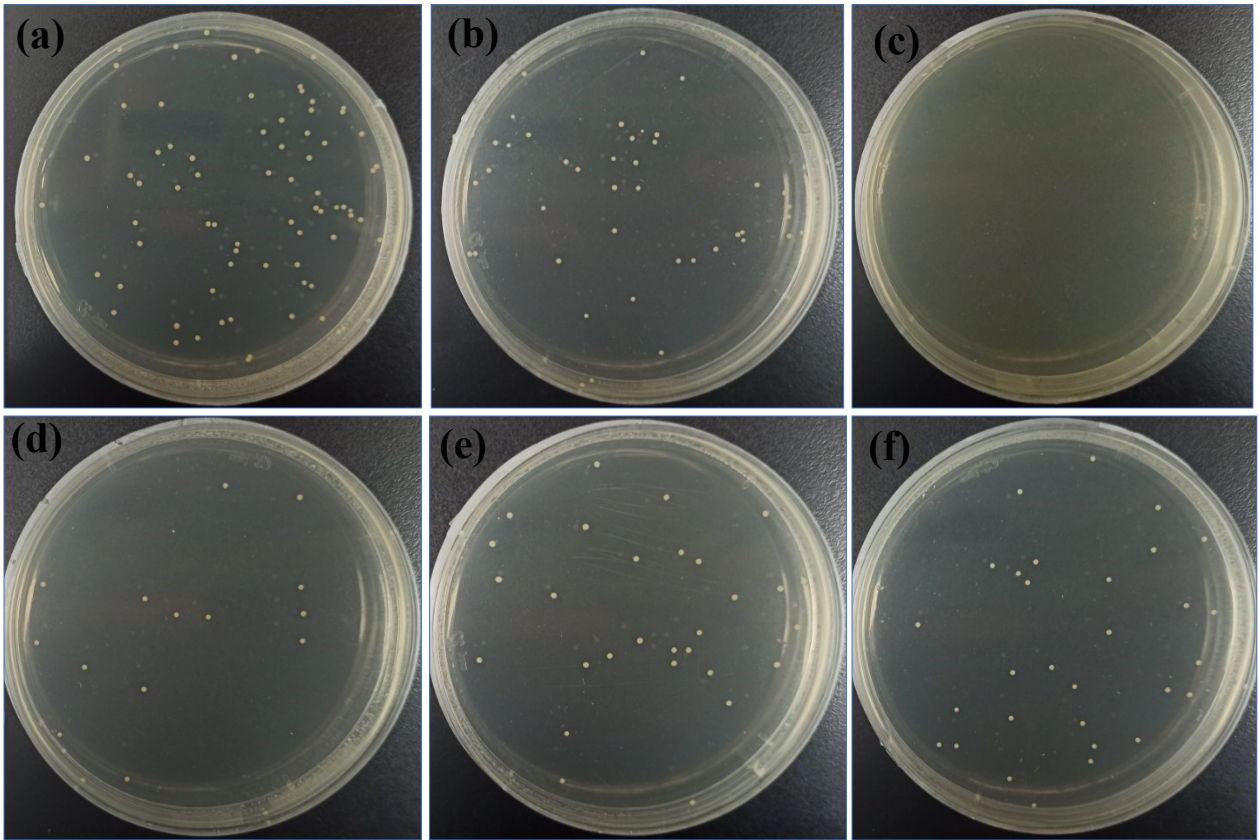

**Figure S2.** Photograph images of the antibacterial tests of (a) control (b) pristine HAp, (b) Ag-, (c) Zn-, (d) Cu-, and (e) Mg-HAps toward *S. aureus* bacteria on Petri dishes.



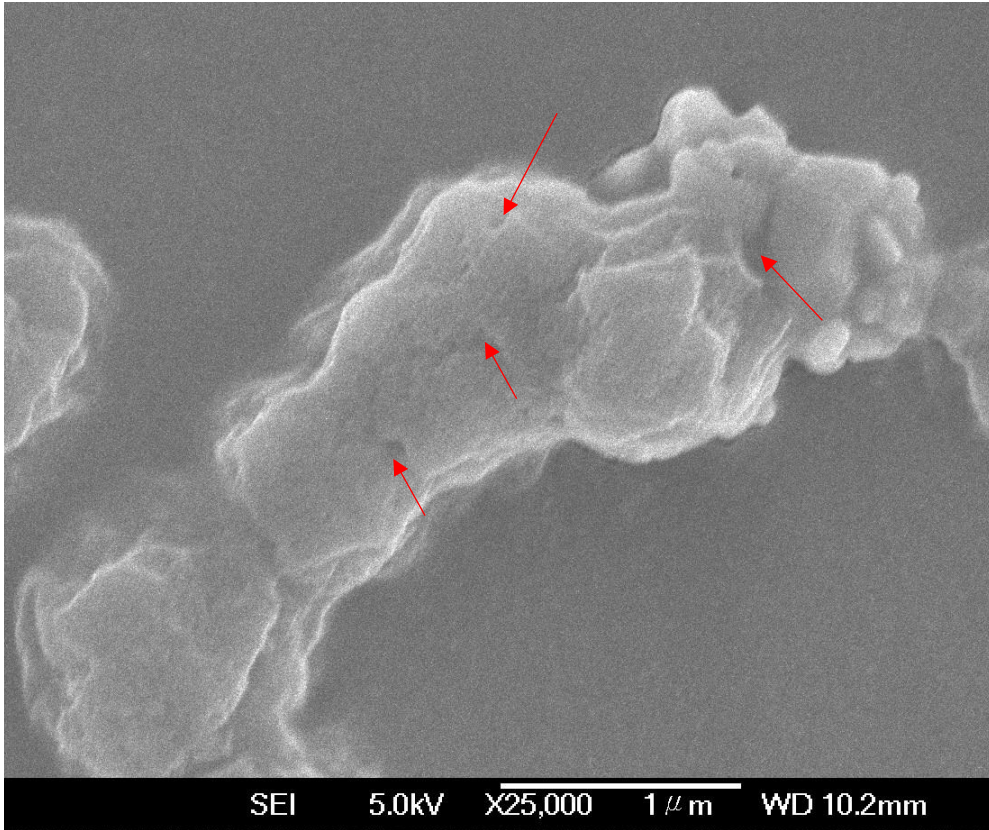

**Figure S2.** Scanning electron microscope images of death *E. coli* bacteria. Red arrows to show the disruptive membrane.
